# Supplementary material for: Early growth response 2 regulates mouse cooperative behavior
Source: Research Square preprint supplement (doi:10.21203/rs.3.rs-105053/v1), 2020-12-02
Supplement: Supplementary file 2 [file c0cbcbd3af32d499c1eeb916.xlsx]

## Sheet: Sheet1
Arc primers for ChIP-qPCR
	Sequence (5'to3')
Arc1-F	CCCCTACGGACAGGGGGT
Arc1-R	GGTCTGTCTGCACACATGCCAG
Arc2-F	ACTGACTCTGGCCACTGAA
Arc2-R	TTTCCTATGGGGGAATCCT
Arc3-F	TCCCTCCAGACTCAGGCCTGCA
Arc3-R	ATTAGAGGTGAGTAGGCGGACA
Arc4-F	AAACTCTAGTTAGTCCCTATTC
Arc4-R	CTGGGGGAAAAAAAACTCCCCT
Arc5-F	TTAGAAATGCCAGGAGAGCCAT
Arc5-R	AGCTTTGGGGAGCCCTGCCT
Arc6-F	GGGAGGGGGGACAGGTTGGCT
Arc6-R	GTACTCACATCTCAGCTTCTCC
Arc7-F	TGTAGGTGTGTGAGCAAAA
Arc7-R	TGTAGACTCATGCCCCCCACT
Arc8-F	GGGGGCATGAGTCCACAGA
Arc8-R	AGAACCCCCTTTCCTCTCTG
Arc9-F	TATGTATGAGTGTGAGAGAG
Arc9-R	GAAACACAGGTCTAGGTC
Arc10-F	GATATGTCCCCAAGTAAC
Arc10-R	CTCTAGAGGGAGGCCCCTTCCG
Arc11-F	ACAGCGCTGTTGGCTGTT
Arc11-R	CCGGAGGAAGGAGGGAGGGA
Arc12-F	TGCAGGCTCCTTCCCCTCCTT
Arc12-R	AGGGATATCAAGATGTGTAGGC
Arc13-F	CCTAGGGACTTCAGGGTTCA
Arc13-R	ACACTGAGTGGCCCTGTCTG
Arc14-F	GCACTGCGGCCCTGTTCAGC
Arc14-R	TTGCCCCAAGAGTCATAAGT
Arc15-F	CGAACAATATTGGACCAGGCT
Arc15-R	TCCAAACCCTTCTATCCTCAG
Arc16-F	TGTGTGTGTGTCCCGCTAAC
Arc16-R	GGACGTTACCCCTCTGAATC
Arc17-F	ATGGGCAAGAGTCAGGATGG
Arc17-R	TCTCCTCTACCTAGTCCTGGGC
Arc18-F	AACCTGCCTTAGCCTCATCCTC
Arc18-R	CCGTGGGTGCCCTCAAGGA
Arc19-F	ACTAGGTAGAGGAGAGTG
Arc19-R	TGCCGCAGGCCCCGCCTT
Arc20-F	TCCTTGAGGGCACCCACG
Arc20-R	TGGCACATACTCCAAACC
Arc21-F	CCAGGGCTCCACGAGCTG
Arc21-R	GGTACATAGGCGGTGGGTGTTC
Primers for other qPCR
Egr2-F	TCAGTGGTTTTATGCACCAGC
Egr2-R	GAAGCTACTCGGATACGGGAG
Myoc-F	CTGCTTGGTGTGGGGAATG
Myoc-R	TCCCTTGGGCAGCTAGATTCA
Rxrg-F	CATGAGCCCTTCAGTAGCCTT
Rxrg-R	CGGAGAGCCAAGAGCATTGAG
Adora2a-F	GGGCCGTGTGGATCAACAG
Adora2a-R	TGTCGATGGCAATAGCCAAGA
Lef1-F	AGAAATGAGAGCGAATGTCGTAG
Lef1-R	CTTTGCACGTTGGGAAGGA
Drd1-F	CACGGCATCCATCCTTAACCT
Drd1-R	TGCCTTCGGAGTCATCTTCCT
Nab2-F	TGGCAGAGGGGATAACACAC
Nab2-R	CGTTGCAGGACCCGATACAG
Rarb-F	GCAGTGCGTGGACACATGA
Rarb-R	GGCAGGGAGAGTCCTCTGAT
Dusp10-F	CCATCTCCTTTAGACGACAGGG
Dusp10-R	GCTACCACTACCTGGGCTG
Cldn11-F	ATGGTAGCCACTTGCCTTCAG
Cldn11-R	AGTTCGTCCATTTTTCGGCAG
Arc-F	GTTAGCCCCTATGCCATCACC
Arc-R	CTGGCCCATTCATGTGGTTCT
Nr4a2-F	GTGTTCAGGCGCAGTATGG
Nr4a2-R	TGGCAGTAATTTCAGTGTTGGT
Myo3b-F	GGACAGCCTCACTTTATTCGTT
Myo3b-R	ATGCTGACGGTCTCCAGGAT
Drd2-F	ACCTGTCCTGGTACGATGATG
Drd2-R	GCATGGCATAGTAGTTGTAGTGG
Egr1-F	TCGGCTCCTTTCCTCACTCA
Egr1-R	CTCATAGGGTTGTTCGCTCGG
Cd24a-F	GTTGCACCGTTTCCCGGTAA
Cd24a-R	CCCCTCTGGTGGTAGCGTTA
Sdk2-F	GGGCTACAAGCTGATTGCCT
Sdk2-R	AGCAGAGGACCGAGGTAAAGT
NTs-F	GCAAGTCCTCCGTCTTGGAAA
NTs-R	TGCCAACAAGGTCGTCATCAT
Cartpt-F	CCCGAGCCCTGGACATCTA
Cartpt-R	GCTTCGATCTGCAACATAGCG
Slc10A4-F	TGTCACCTCTAGTCCCGGTC
Slc10A4-R	CACAAACACATTCAGCCCGTG
Drd5-F	CTCGGCAACGTCCTAGTGTG
Drd5-R	AATGCCACGAAGAGGTCTGAG
Zic1-F	CAGTATCCCGCGATTGGTGT
Zic1-R	GCGAACTGGGGTTGAGCTT
Htr1d-F	TCCAAACCAGTCCCTAGAAGG
Htr1d-R	CACCACGAGCGAGATTCTGA
Pcsk9-F	GAGACCCAGAGGCTACAGATT
Pcsk9-R	AATGTACTCCACATGGGGCAA
Oligo2-F	GGCGGTGGCTTCAAGTCAT
Oligo2-R	CATGGCGATGTTGAGGTCG
Sox10-F	AGGTTGCTGAACGAAAGTGAC
Sox10-R	CCGAGGTTGGTACTTGTAGTCC
ErBb3-F	TCTGCATTAAAGTCATCGAGGAC
ErBb3-R	CAGCCGTACAATGTGGGCAT
PDGFRα-F	GGAGACTCAAGTAACCTTGCAC
PDGFRα-R	TCAGTTCTGACGTTGCTTTCAA
Enpp6-F	AGAACCGCTGTGGATCACTCT
Enpp6-R	AGGCAGTAAGTTGGTCTGACA
MBP-F	GACCATCCAAGAAGACCCCAC
MBP-R	GCCATAATGGGTAGTTCTCGTGT
CC1-F	GGCGTGAAATCCGAGTCCTTC
CC1-R	CCACCTGCAATAACTCTGCAA
GAPDH-F	AGGTCGGTGTGAACGGATTTG
GAPDH-R	GGGGTCGTTGATGGCAACA
